# Supplementary material for: Iron Oxide Nanoparticle-Mediated mRNA Delivery to Hard-to-Transfect Cancer Cells
Source: MDPI journal article supplement (doi:10.3390/pharmaceutics15071946), 2023-07-14
Supplement: s1 [file s1]

# Supplementary Materials: Iron Oxide Nanoparticle-Mediated mRNA Delivery to Hard-to-Transfect Cancer Cells

Jianxi Huang, Guanyou Lin, Taylor Juenke, Steve Chung, Nicholas Lai, Tianxin Zhang, Tianyi Zhang and Miqin Zhang \*

Department of Materials Science and Engineering, University of Washington, Seattle 98195, USA  
\* Correspondence: mzhang@uw.edu

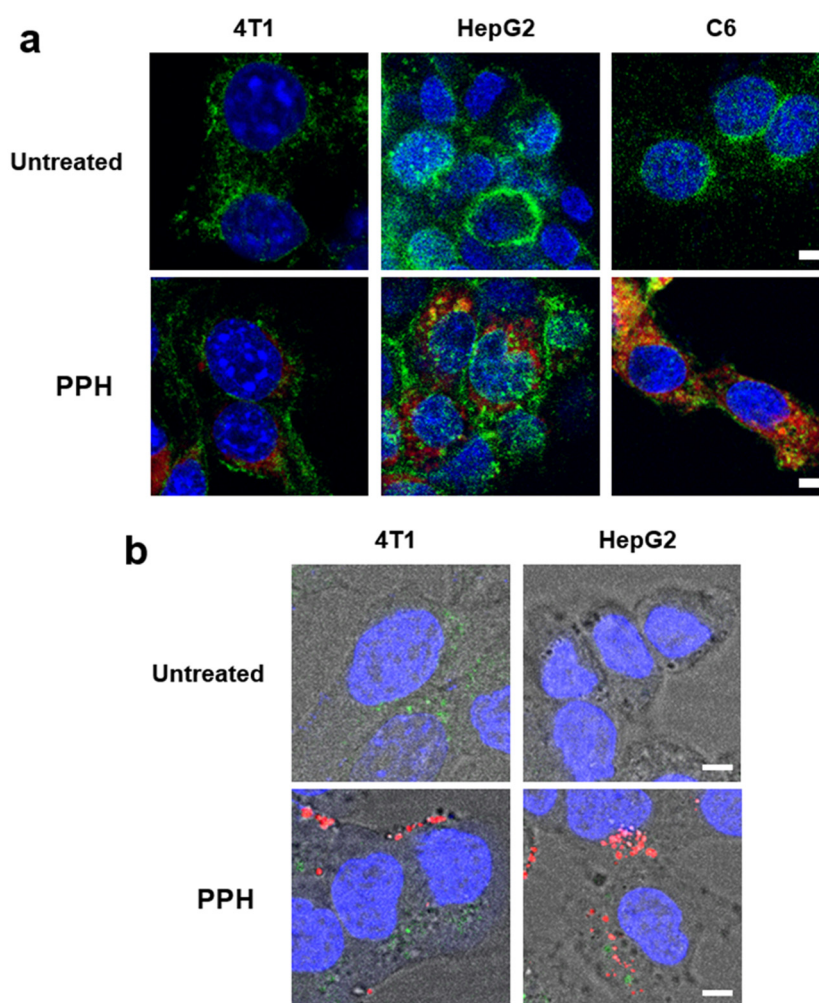

**Figure S1.** Cellular uptake and endosomal escape studies of mRNA-PPH on various cancer cell lines. (a) Confocal images of untreated cells (top row) and cells treated with mRNA-PPH (red, bottom row) showing that mRNA-PPH (red) was able to transport across cancer cell membranes (green). PPH in mRNA-PPH was labeled by Cy5 (red) before complexation into mRNA-PPH. mRNA-PPH was added to cell culture and incubated for 8 hours. DAPI nuclear was stained in blue. Scale bar is 5  $\mu\text{m}$ . (b). Confocal images of untreated cells (top row) and cells treated with mRNA-PPH (bottom row) showing that the signal of mRNA-PPH (red) was distinguished from the signal of endosomes (green). These results indicated the mRNA was able to escape from endosomes, mediated by PPH. Cy5-labeled mRNA was complexed with PPH and added to cell cultures and incubated for 12 hours before adding Lysotracker Red reagent and incubated for another 1 hour. DAPI nuclear was stained in blue. Scale bar is 5  $\mu\text{m}$ .

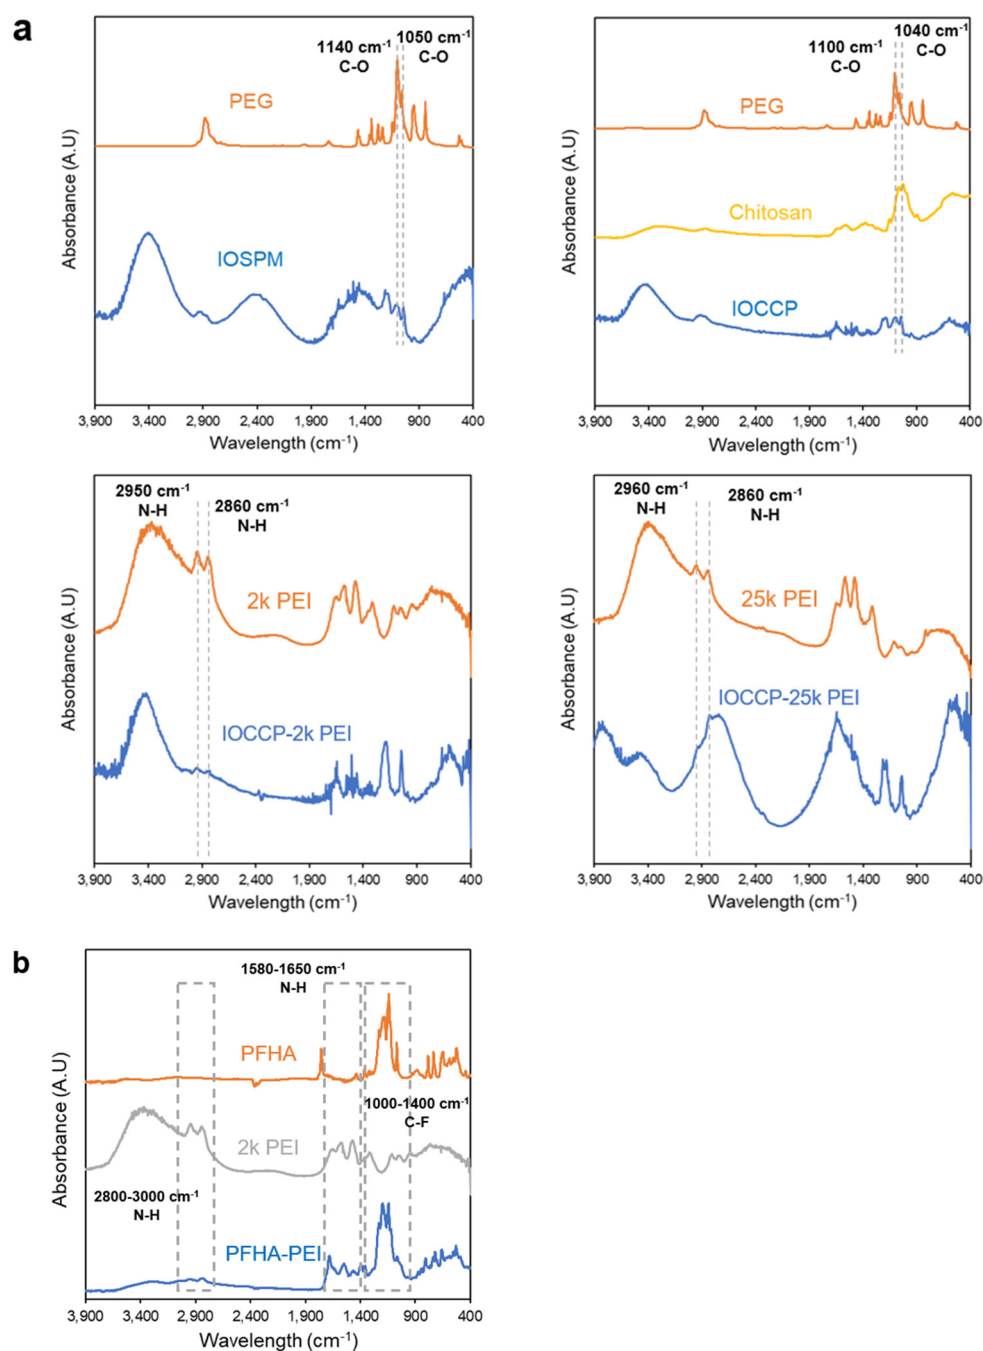

**Figure S2.** FTIR spectra of (a) four nanoparticle cores modified with a charge-bearing thin layer and (b) the outer coating polymer component perfluoroheptanoic acid-polyethyleneimine (PFHA-PEI). The IOSPM core has absorbance peaks of PEG at 1050–1140 cm<sup>-1</sup>, which correspond to the stretching of C-O bonds. The IOCCP core inherits the peaks at around 1100 cm<sup>-1</sup> and 1040 cm<sup>-1</sup> from PEG's and chitosan's C-O stretching respectively. Two characteristic peaks of 2k PEI/25k PEI at 2810–2840 cm<sup>-1</sup> and 2930–2970 cm<sup>-1</sup> were found in both IOCCP-2k PEI and IOCCP-25k PEI, which correspond to N-H stretching in PEI. For the coating polymer component PFHA-PEI, the spectrum exhibited both characteristic peaks of C-F stretching from PFHA at 1000–1400 cm<sup>-1</sup> and N-H bending at 1580–1650 cm<sup>-1</sup> and N-H stretching at 2800–3000 cm<sup>-1</sup> from PEI.

**Table S1.** mRNA encapsulation efficiency and mRNA loading of nanocomplex.

| Material                 | mRNA Encapsulation Efficiency | mRNA loading <sup>1</sup> |
|--------------------------|-------------------------------|---------------------------|
| (IOSPM)-mRNA-PPH         | 70.6% ± 12.0%                 | 4.2% ± 0.7%               |
| (IOCCP)-mRNA-PPH         | 83.7% ± 6.4%                  | 4.9% ± 0.4%               |
| (IOCCP-2k PEI)-mRNA-PPH  | 79.6% ± 22.7%                 | 4.7% ± 1.4%               |
| (IOCCP-25k PEI)-mRNA-PPH | 82.6% ± 5.1%                  | 4.9% ± 0.3%               |

<sup>1</sup> mRNA loading (in weight percentage) was defined by the following equation, based on the measured mRNA encapsulation efficiency and the assumption that other components (NP, PPH) were fully encapsulated:

$$\begin{aligned}
 \text{mRNA loading} &= \frac{\text{mRNA mass} * \text{mRNA encapsulation efficiency}}{\text{Total complex mass}} \\
 &= \frac{\text{mRNA mass} * \text{mRNA encapsulation efficiency}}{\text{NP mass} + \text{mRNA mass} * \text{mRNA encapsulation efficiency} + \text{PPH mass}}
 \end{aligned}$$

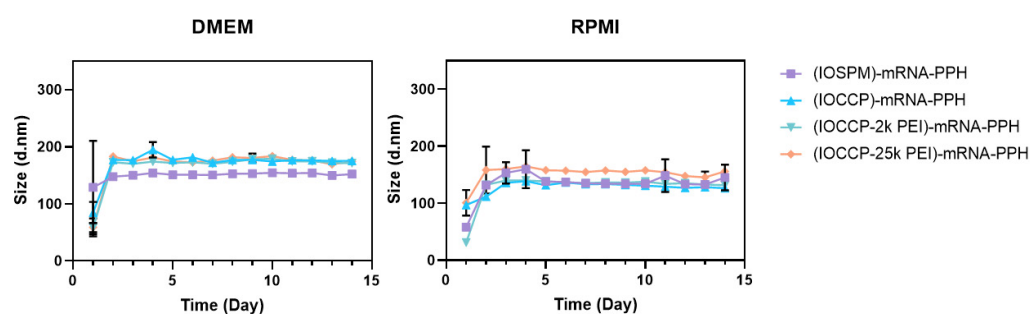**Figure S3.** Size stability of NP-mRNA-PPHs in two cell media containing 10% serum (DMEM and RPMI). The hydrodynamic sizes are presented as z – average size.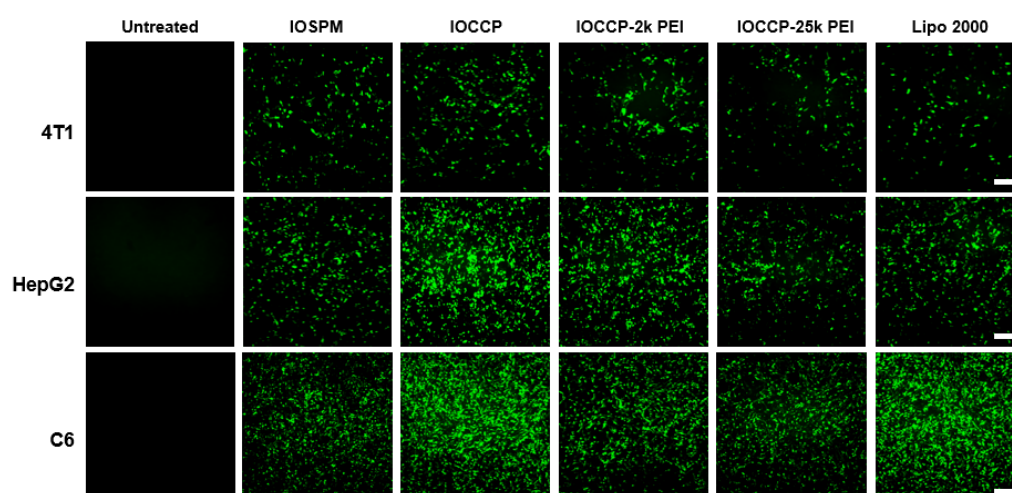**Figure S4.** Confocal fluorescence images of 4T1, HepG2 and C6 cancer cell lines transfected with various NP-mRNA-PPH complexes (named according to their core materials (top row) and lipofectamine 2000 (Lipo 2000)). Scale bar is 200  $\mu$ m. The IOCCP-mRNA-PPH complex demonstrated the highest transfection efficiency in all three cancer cells, as compared to other NP-mRNA-PPH complexes.

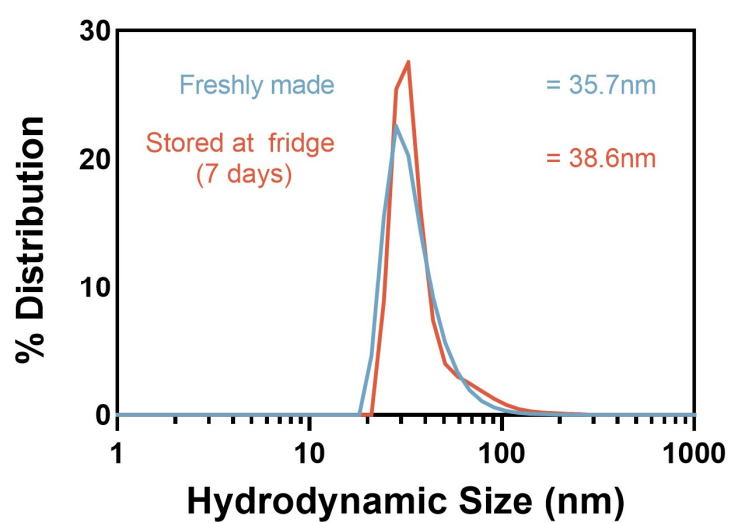

**Figure S5.** Size stability of the (IOCCP)-mRNA-PPH complexes under two storage conditions. The samples were freshly prepared within an hour (blue) and stored at 4 °C fridge for 7 days (red). The sample stored at fridge showed similar size distribution as that of the freshly made one.
